# Supplementary material
Source: HighWire-hosted journal article supplement (https://bmjopen.bmj.com/content/8/10/e021203)
Supplement: inline-supplementary-material-1 [file inline-supplementary-material-1.pdf]

**Supplementary Table 1.** Demographic characteristics of patients visiting the ten clinical services who were HIV tested or not HIV tested<sup>1</sup>.

| Clinical Service     | M/<br>F | Tested     |                                                    |                                                                     |                                                  |                                                                | Not tested |                                                 |                                                                  |                                                  |                                                             |
|----------------------|---------|------------|----------------------------------------------------|---------------------------------------------------------------------|--------------------------------------------------|----------------------------------------------------------------|------------|-------------------------------------------------|------------------------------------------------------------------|--------------------------------------------------|-------------------------------------------------------------|
|                      |         | No. (%)    | Swiss<br>No. (%)<br>Median<br>Age [yrs]<br>(range) | Neighbour<br>countries<br>No. (%)<br>Median<br>Age [yrs]<br>(range) | SSA<br>No. (%)<br>Median<br>Age [yrs]<br>(range) | Other/<br>unknown<br>No. (%)<br>Median<br>Age [yrs]<br>(range) | No. (%)    | Swiss<br>No. (%)<br>Median Age<br>[yrs] (range) | Neighbour<br>countries<br>No. (%)<br>Median Age<br>[yrs] (range) | SSA<br>No. (%)<br>Median<br>Age [yrs]<br>(range) | Other/<br>unknown<br>No. (%)<br>Median Age<br>[yrs] (range) |
| Neurology            | M       | 595 (51)   | 411 (69)<br>65 (16-92)                             | 72 (12)<br>60 (18-89)                                               | 11 (1.8)<br>45 (22-62)                           | 101 (17)<br>51 (16-83)                                         | 1,491 (51) | 1,084 (73)<br>72 (17-99)                        | 182 (12)<br>72 (16-94)                                           | 13 (0.9)<br>55 (24-80)                           | 212 (15)<br>59 (18-93)                                      |
|                      | F       | 559 (49)   | 403 (72)<br>60 (16-95)                             | 53 (9.5)<br>52 (16-87)                                              | 7 (1.2)<br>39 (16-55)                            | 96 (17)<br>41 (16-87)                                          | 1,416 (49) | 1,133 (80)<br>77 (16-102)                       | 102 (7.2)<br>74 (19-95)                                          | 14 (1)<br>35 (28-56)                             | 167 (11)<br>53 (16-95)                                      |
| Internal<br>medicine | M       | 1,439 (60) | 960 (67)<br>67 (17-98)                             | 158 (11)<br>71 (23-90)                                              | 43 (3)<br>49 (19-82)                             | 278 (19)<br>58 (16-90)                                         | 3,766 (49) | 2,776 (73.5)<br>76 (16-101)                     | 470(12.5)<br>75 (27-97)                                          | 47(1.5)<br>46 (18-87)                            | 473(12.5)<br>63 (16-100)                                    |
|                      | F       | 940 (40)   | 688 (73)<br>68 (17-95)                             | 81 (8.6)<br>71 (19-90)                                              | 32 (3.4)<br>38 (20-64)                           | 139 (15)<br>55 (18-87)                                         | 3,859 (51) | 3,104 (80)<br>82 (17-105)                       | 333 (8.6)<br>80 (22-100)                                         | 37 (1)<br>50 (18-88)                             | 385 (10)<br>63 (18-100)                                     |
| Psychiatry           | M       | 505 (58)   | 304 (60)<br>38 (17-93)                             | 60 (12)<br>44 (20-87)                                               | 29 (5.7)<br>38 (19-45)                           | 112 (22)<br>35 (18-76)                                         | 1,904 (50) | 1,184 (62)<br>48 (16-99)                        | 219 (11)<br>47 (18-96)                                           | 71 (3.7)<br>34 (18-65)                           | 430 (23)<br>41 (16-92)                                      |
|                      | F       | 362 (42)   | 238 (66)<br>42 (16-93)                             | 29 (8)<br>44 (17-92)                                                | 11 (3)<br>27 (20-73)                             | 84 (23)<br>39 (18-85)                                          | 1,902 (50) | 1,379 (73)<br>56 (16-104)                       | 158 (8.3)<br>47 (19-88)                                          | 61 (3.2)<br>36 (16-74)                           | 304 (16)<br>39 (16-91)                                      |

|                    |   |            |                               |                         |                         |                          |                |                             |                            |                         |                            |
|--------------------|---|------------|-------------------------------|-------------------------|-------------------------|--------------------------|----------------|-----------------------------|----------------------------|-------------------------|----------------------------|
| <b>ICU</b>         | M | 927 (68)   | 618 (67)<br>61 (16-89)        | 111 (12)<br>61 (20-87)  | 21 (2.3)<br>47 (19-80)  | 177 (19)<br>53 (19-85)   | 3,593 (65)     | 2,562 (71)<br>68 (16-96)    | 447 (12)<br>65 (16-91)     | 27 (0.8)<br>42 (17-78)  | 557 (15)<br>55 (16-91)     |
|                    | F | 429 (32)   | 311 (73)<br>60 (16-90)        | 32 (7.5)<br>62 (28-85)  | 12 (2.8)<br>36 (26-55)  | 74 (17)<br>51 (22-89)    | 1,942 (35)     | 1,511 (78)<br>70 (16-96)    | 149 (7.7)<br>73 (18-94)    | 15 (0.8)<br>40 (18-73)  | 267 (14)<br>55 (17-94)     |
| <b>Surgery</b>     | M | 584 (67)   | 400 (68.5)<br>63 (16-94)      | 62 (10.6)<br>65 (21-84) | 16 (2.7)<br>38 (19-70)  | 106 (18.2)<br>53 (18-84) | 2,866 (61)     | 2,098 (73.2)<br>68 (16-97)  | 327 (11.4)<br>69 (18-98)   | 31 (1.1)<br>41 (20-78)  | 410 (14.3)<br>58 (18-98)   |
|                    | F | 291 (33)   | 223 (77)<br>59 (17-90)        | 20 (6.9)<br>68 29-89)   | 8 (2.7)<br>56 (26-70)   | 40 (14)<br>44 (25-79)    | 1,839 (49)     | 1,436 (78)<br>70 (16-100)   | 144 (7.8)<br>69 (20-100)   | 17 (0.9)<br>44 (17-64)  | 242 (13)<br>50 (20-100)    |
| <b>Dermatology</b> | M | 1,631 (62) | 1,029 (63)<br>59 (18-71)      | 184 (11)<br>48 (16-99)  | 72 (4.4)<br>34 (17-87)  | 346 (21)<br>43 (16-83)   | 9,317 (46)     | 5,820 (62.5)<br>60 (16-101) | 1,233 (13.2)<br>49 (16-96) | 307 (3.3)<br>34 (16-80) | 1,957 (21)<br>45 (16-96)   |
|                    | F | 1,001 (38) | 673 (67.2)<br>59 (17-88)      | 32 (3.2)<br>52 (16-96)  | 30 (3.0)<br>52 (19-85)  | 266(26.6)<br>43 (16-82)  | 11,083<br>(54) | 7,095 (64)<br>54 (16-105)   | 1,172 (11)<br>45 (16-101)  | 265 (2.4)<br>33 (17-72) | 2,551 (23)<br>39 (16-94)   |
| <b>ED</b>          | M | 2,853 (60) | 1,791<br>(62.8)<br>64 (16-98) | 315 (11)<br>62 (18-90)  | 139 (4.9)<br>37 (17-83) | 608 (21.3)<br>52 (16-90) | 17,985<br>(52) | 11,923 (66)<br>68 (16-105)  | 2,138 (12)<br>42 (16-99)   | 434 (2.4)<br>55 (16-87) | 3,490 (19)<br>50 (16-111)  |
|                    | F | 1,864 (40) | 1,291<br>(69.2)<br>63 (16-95) | 164 (8.8)<br>66 (16-90) | 59 (3.2)<br>37 (19-69)  | 350 (18.8)<br>46 (16-90) | 16,672<br>(48) | 12, 577 (75)<br>70 (16-106) | 1,405 (8.4)<br>40 (16-102) | 262 (1.6)<br>55 (16-88) | 2,428 (16)<br>50 (16-100)  |
| <b>ENT</b>         | M | 538 (78)   | 267 (49.6)<br>54 (17-93)      | 54 (10)<br>63 (27-85)   | 16 (2.8)<br>31 (19-57)  | 201 (37.6)<br>50 (17-78) | 5,747 (52)     | 3,232 (56.2)<br>53 (16-95)  | 744 (12.9)<br>49 (16-101)  | 142 (2.5)<br>36 (16-74) | 1,629 (28.4)<br>46 (16-92) |
|                    | F | 260 (22)   | 175 (67.3)<br>56 (17-93)      | 20 (7.7)<br>52 (21-85)  | 12 (4.6)<br>23 (21-65)  | 53 (20.4)<br>42 (20-80)  | 5,003 (48)     | 3,379 (67.5)<br>56 (16-95)  | 460 (9.2)<br>50 (16-96)    | 81 (1.6)<br>38 (16-68)  | 1,083 (21.7)<br>46 (16-92) |

|                   |   |          |                        |                        |                        |                        |            |                           |                         |                        |                          |
|-------------------|---|----------|------------------------|------------------------|------------------------|------------------------|------------|---------------------------|-------------------------|------------------------|--------------------------|
| <b>Cardiology</b> | M | 633 (74) | 431 (68)<br>62 (20-95) | 73 (12)<br>61 (22-83)  | 15 (2.4)<br>50 (24-73) | 114 (18)<br>56 (16-83) | 4,562 (67) | 3,327 (73)<br>68 (16-98)  | 529 (12)<br>67 (17-99)  | 28 (0.6)<br>48 (23-76) | 678 (16)<br>56 (16-97)   |
|                   | F | 224 (26) | 167 (75)<br>60 (17-95) | 20 (8.9)<br>70 (28-83) | 5 (2.2)<br>37 (20-64)  | 32 (14)<br>57 (27-86)  | 2,279 (33) | 1,787 (78)<br>73 (16-99)  | 207 (9.1)<br>75 (19-94) | 15 (0.6)<br>49 (30-69) | 270 (12)<br>55 (18-99)   |
| <b>Oncology</b>   | M | 686 (63) | 472 (71)<br>65 (23-90) | 81 (12)<br>71 (23-90)  | 18 (2.7)<br>38 (19-72) | 115 (18)<br>56 (17-85) | 5,688 (48) | 3,840 (67)<br>65 (16-99)  | 684 (12)<br>72 (16-100) | 58 (1.0)<br>39 (18-76) | 1,106 (20)<br>56 (16-94) |
|                   | F | 401 (37) | 313 (73)<br>60 (18-94) | 26 (6.1)<br>68 (18-87) | 6 (1.4)<br>46 (36-64)  | 56 (13)<br>51 (22-79)  | 6,246 (52) | 4,409 (71)<br>60 (16-100) | 563 (9)<br>68 (16-102)  | 86 (1.4)<br>46 (17-72) | 1,188 (19)<br>51 (16-94) |

<sup>1</sup> Figures presented are derived from the entire four-year study period. In this way, individual patients (not tested) have been counted once only, no matter how many times they may have presented and specific values may differ from elsewhere in the results section.

<sup>2</sup> Tested patients may have been tested more than once in different services, or undergone tests of confirmation. In this way, patient numbers may be greater than those cited elsewhere in the results section.

<sup>3</sup> Neighbour countries: France, Germany, Austria, Italy and Lichtenstein

Abbreviations: ICU, intensive care units, ED, emergency department; ENT, ear, nose and throat service
